# Supplementary material for: Emission Ellipsometry Study in Polymeric Interfaces Based on POLY(3-Hexylthiophene), PCBM and Graphene
Source: Preprints.org preprint supplement (doi:10.20944/preprints202406.1081.v1), 2024-06-17
Supplement: Supplementary file 1 [file supplementary]

**EMISSION ELLIPSOMETRY STUDY IN POLYMERIC INTERFACES BASED ON POLY(3-HEXYLTHIOPHENE), PCBM AND GRAPHENE**

***Ana Clarissa H. Kolbow* 1, *Everton Crestani Rambo*1, *Maria Ruth Neponucena dos Santos1, Paulo Ernesto Marchezi 2, Ana Flávia Nogueira3, Alexandre Marletta4, Romildo Jerônimo Ramos1, Eralci Moreira Therézio1,****

1 Institute of Physics, Federal University of Mato Grosso, Cuiabá, MT, Brazil; ana.kolbow@fisica.ufmt.br (A.C.H.K.); everton@fisica.ufmt.br (E.C.R.); mariaruth_neponucena@hotmail.com (M.R.N.S.); romildo@fisica.ufmt.br (R.J.R.); therezio@fisica.ufmt.br (E.M.T.)

2 Department of NanoEngineering, University of California San Diego, 9500 Gilman Drive, La Jolla, California 92093, United States; pauloernestom@gmail.com (P.E.M.)

3 Chemistry Institute, University of Campinas, Campinas, SP, Brazil ; anafla@unicamp.br (A.F.N.)

4 Institute of Physics, Federal University of Uberlândia,Uberlândia, MG, Brazil; marletta@ufu.br (A.M.)

***** Correspondence: therezio@fisica.ufmt.br

**
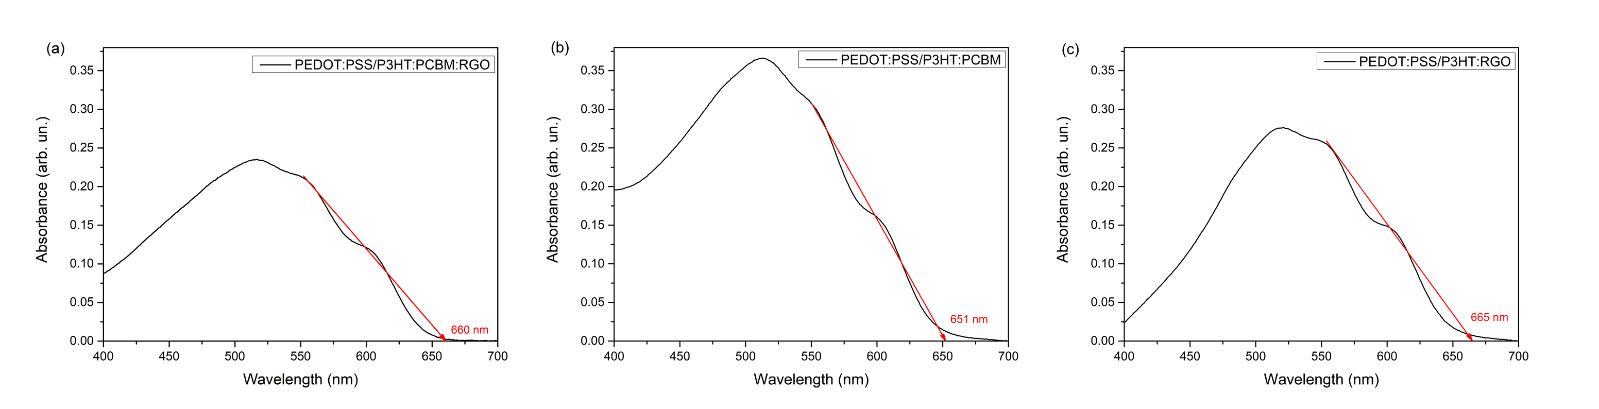
**

**Figure S1.** Absorption spectra for samples (a) PEDOT:PSS/P3HT:PCBM:RGO, (b) PEDOT:PSS/P3HT:PCBM (c) PEDOT:PSS/P3HT:RGO. Indicating cutting length.

**
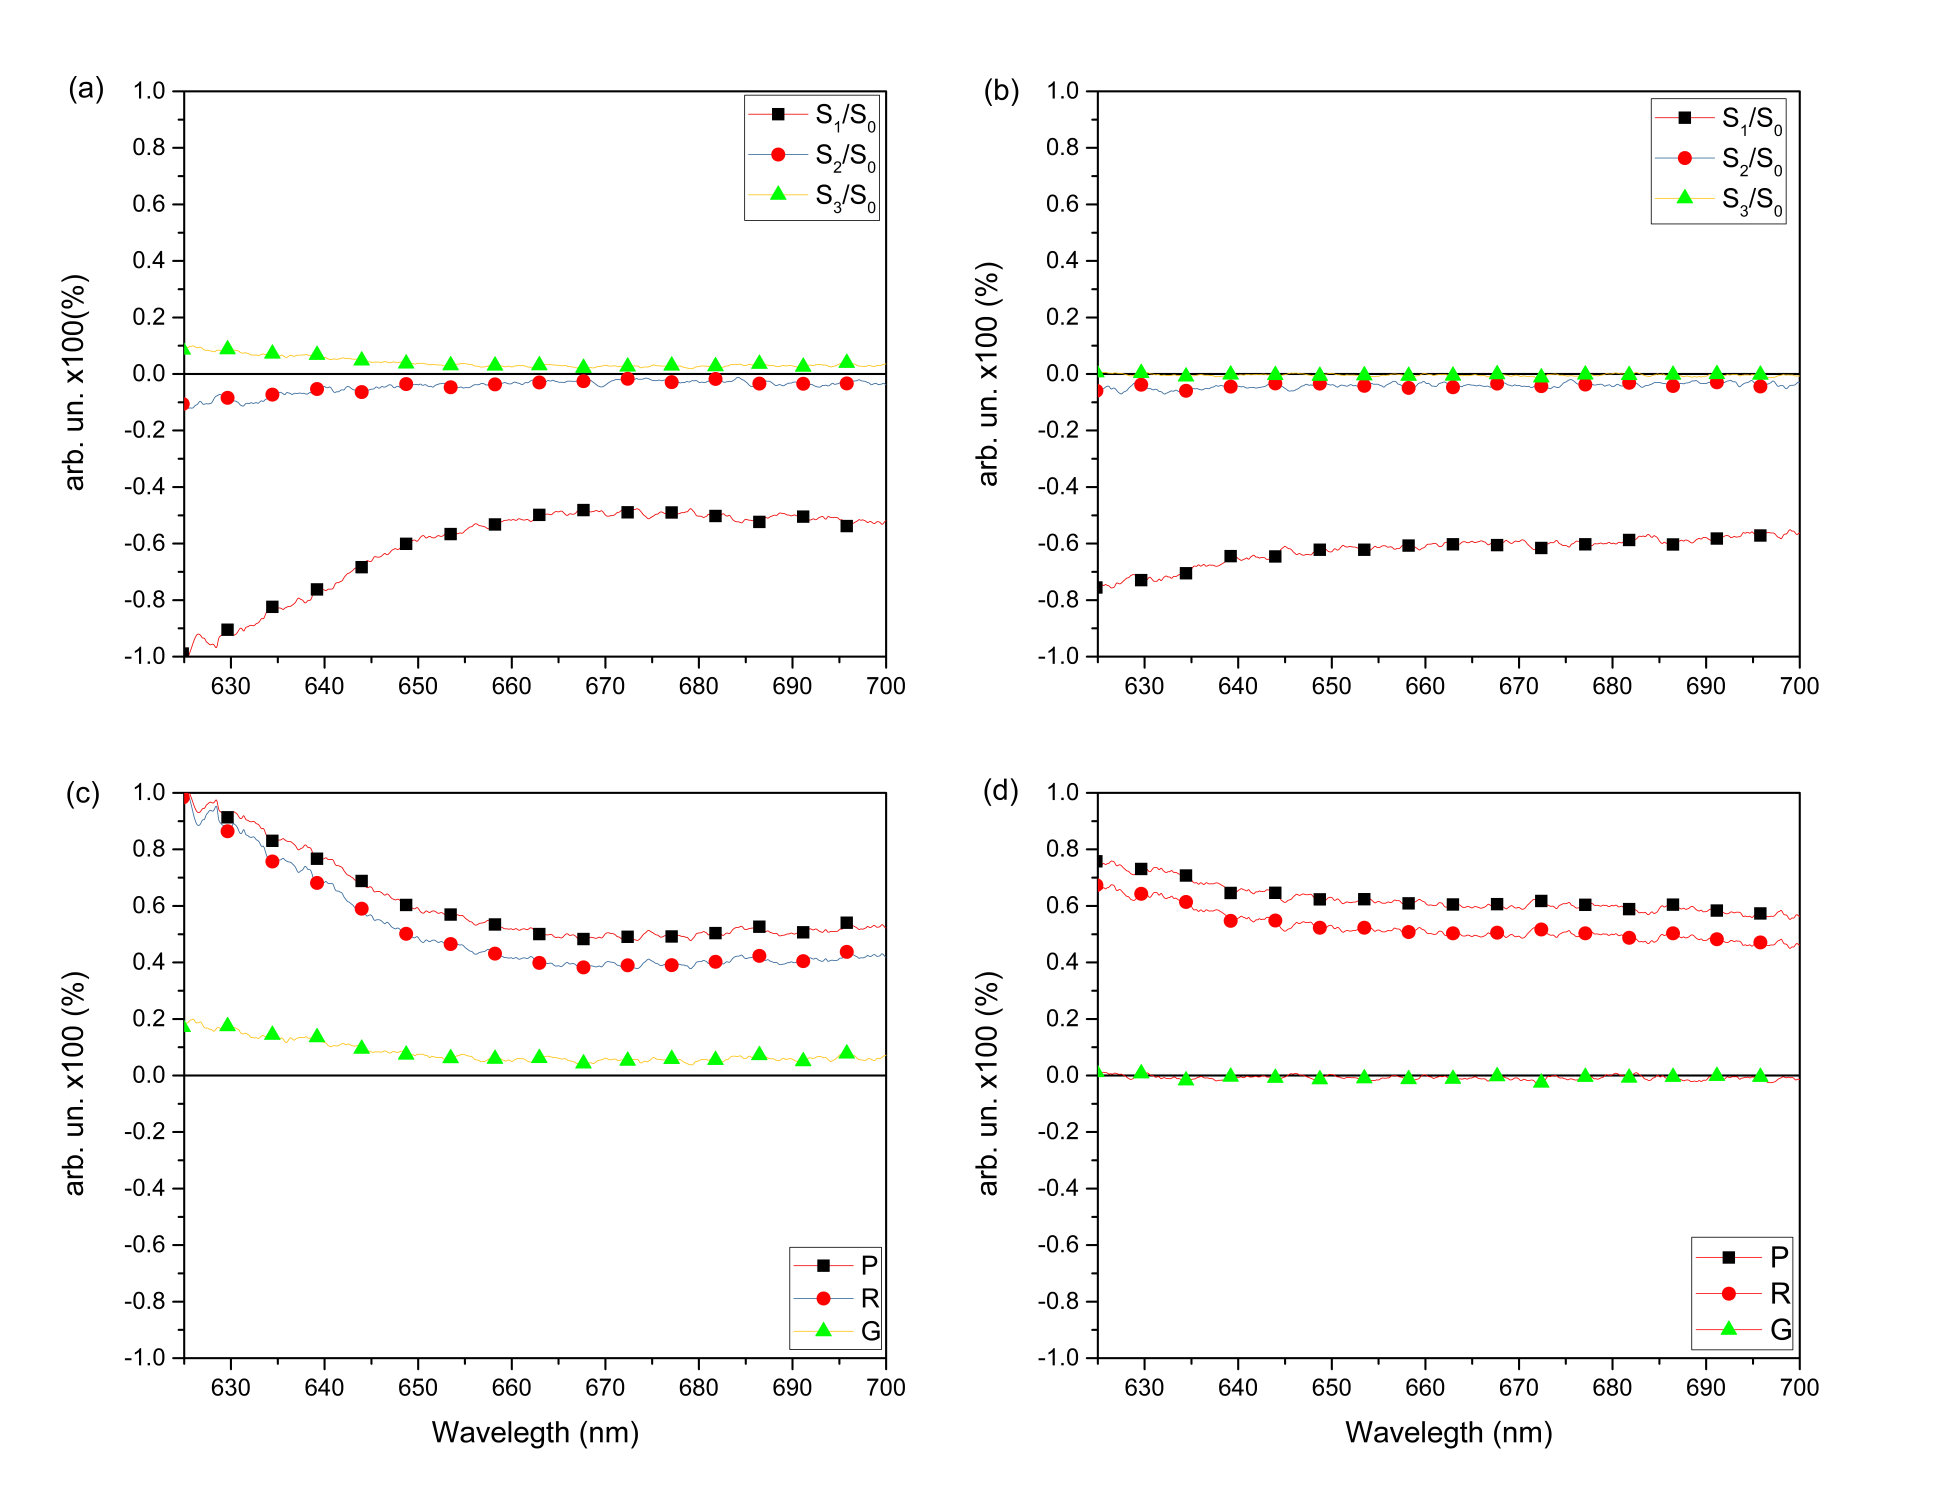
**

**Figure S2.** (a) EE spectra for sample PEDOT:PSS/P3HT:PCBM at 90 K and (b) at 300 K; (c) Polarization degree, P, anisotropy factors, *r*,and asymmetry, *g,* obtained from the Stokes parameters for sample PEDOT:PSS/P3HT:PCBM at 90 K and (d) at 300 K.


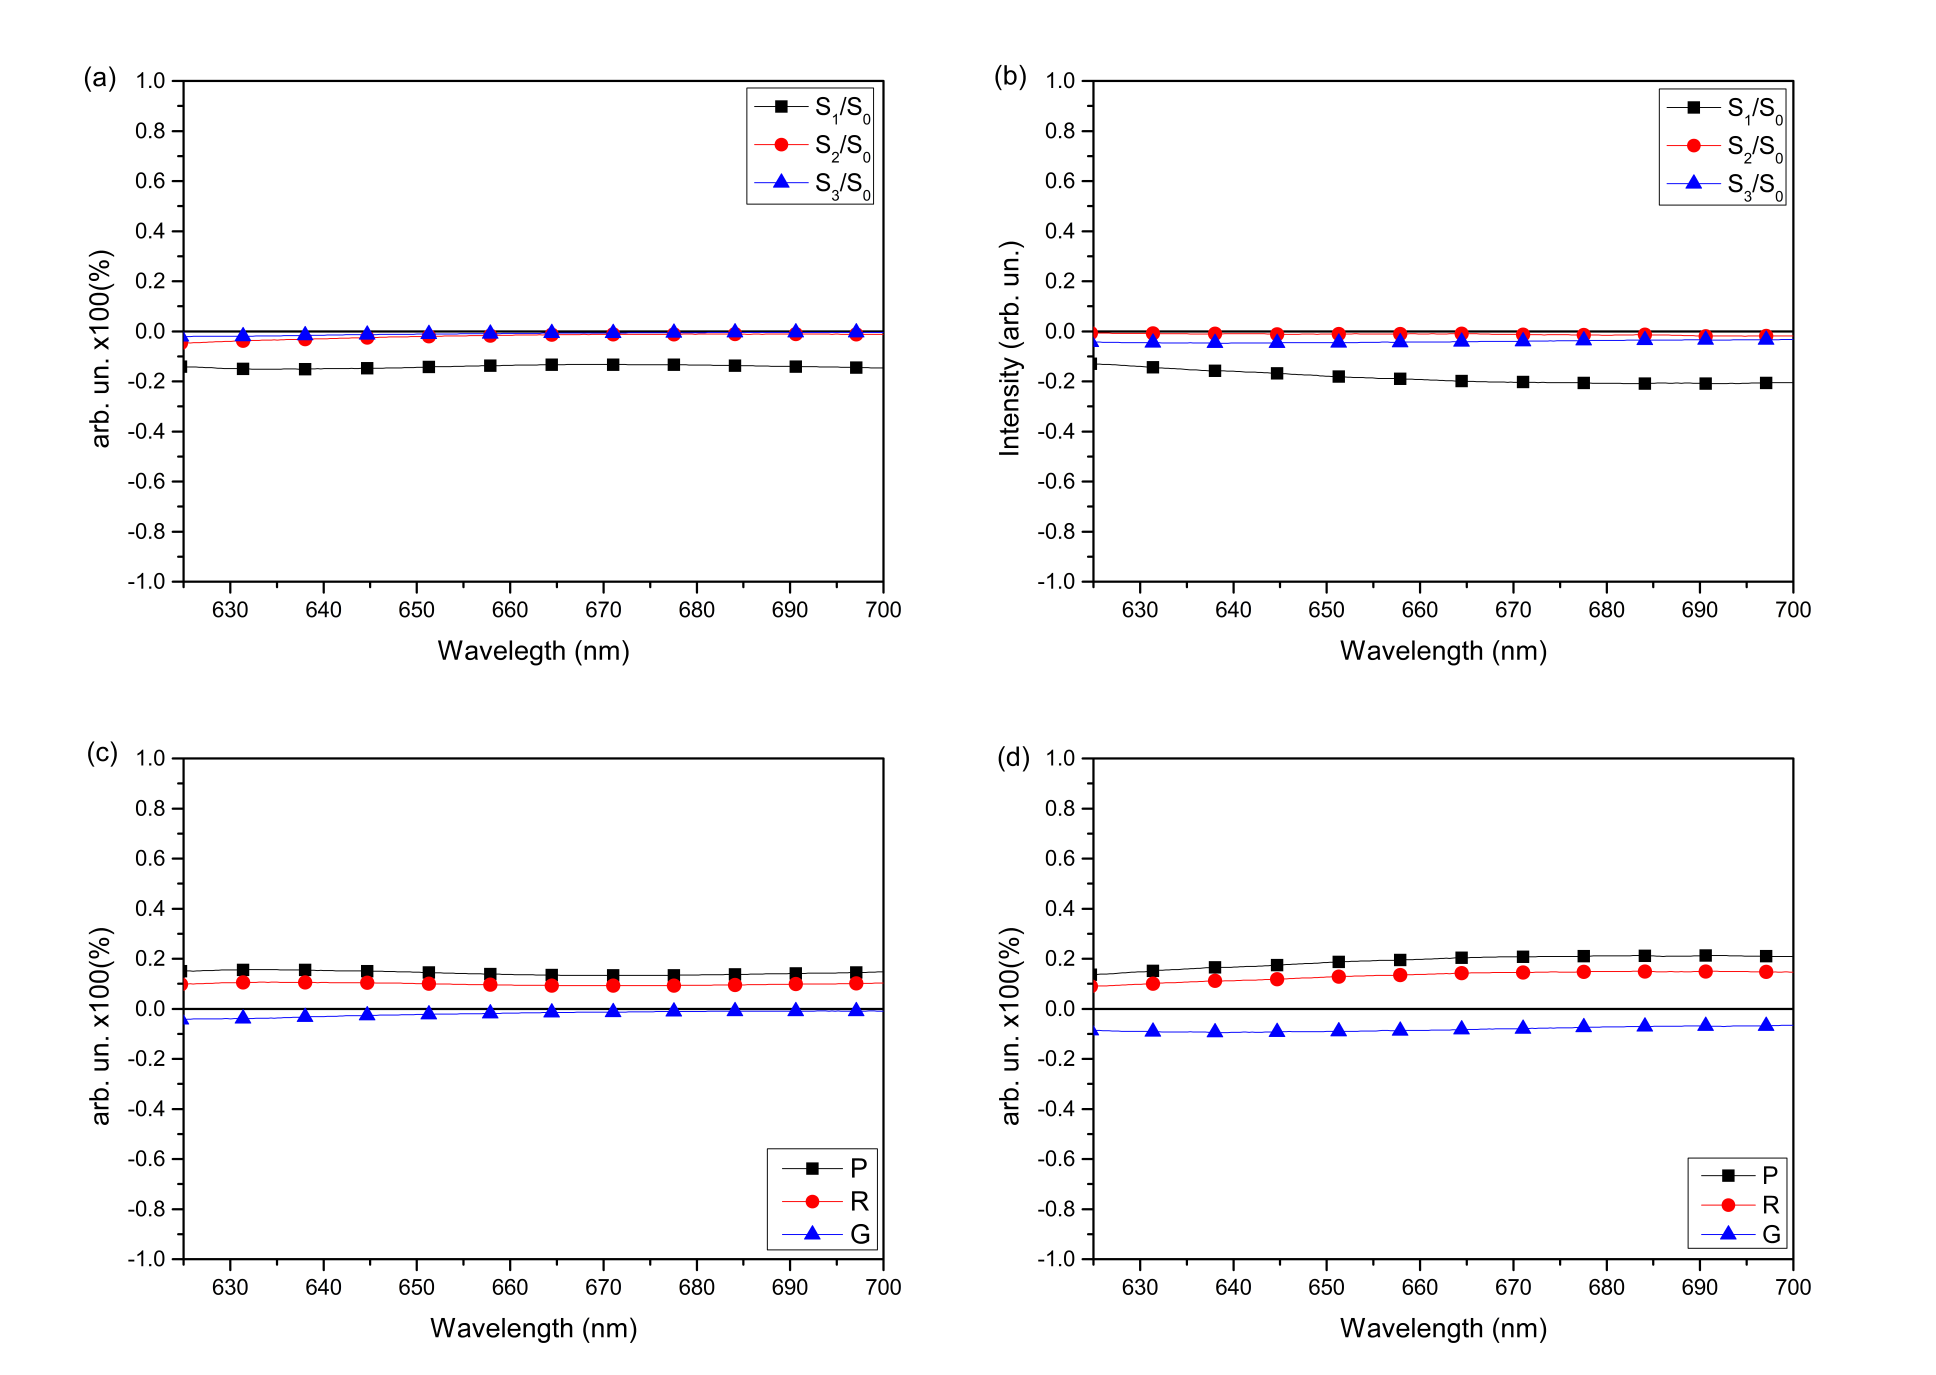


**Figure S3.** (a) EE spectra for sample PEDOT:PSS/P3HT:RGO at 90 K and (b) at 300 K; (c) Polarization degree, P, anisotropy factors, *r*,and asymmetry, *g,* obtained from the Stokes parameters for sample PEDOT:PSS/P3HT:RGO at 90 K and (d) at 300 K.


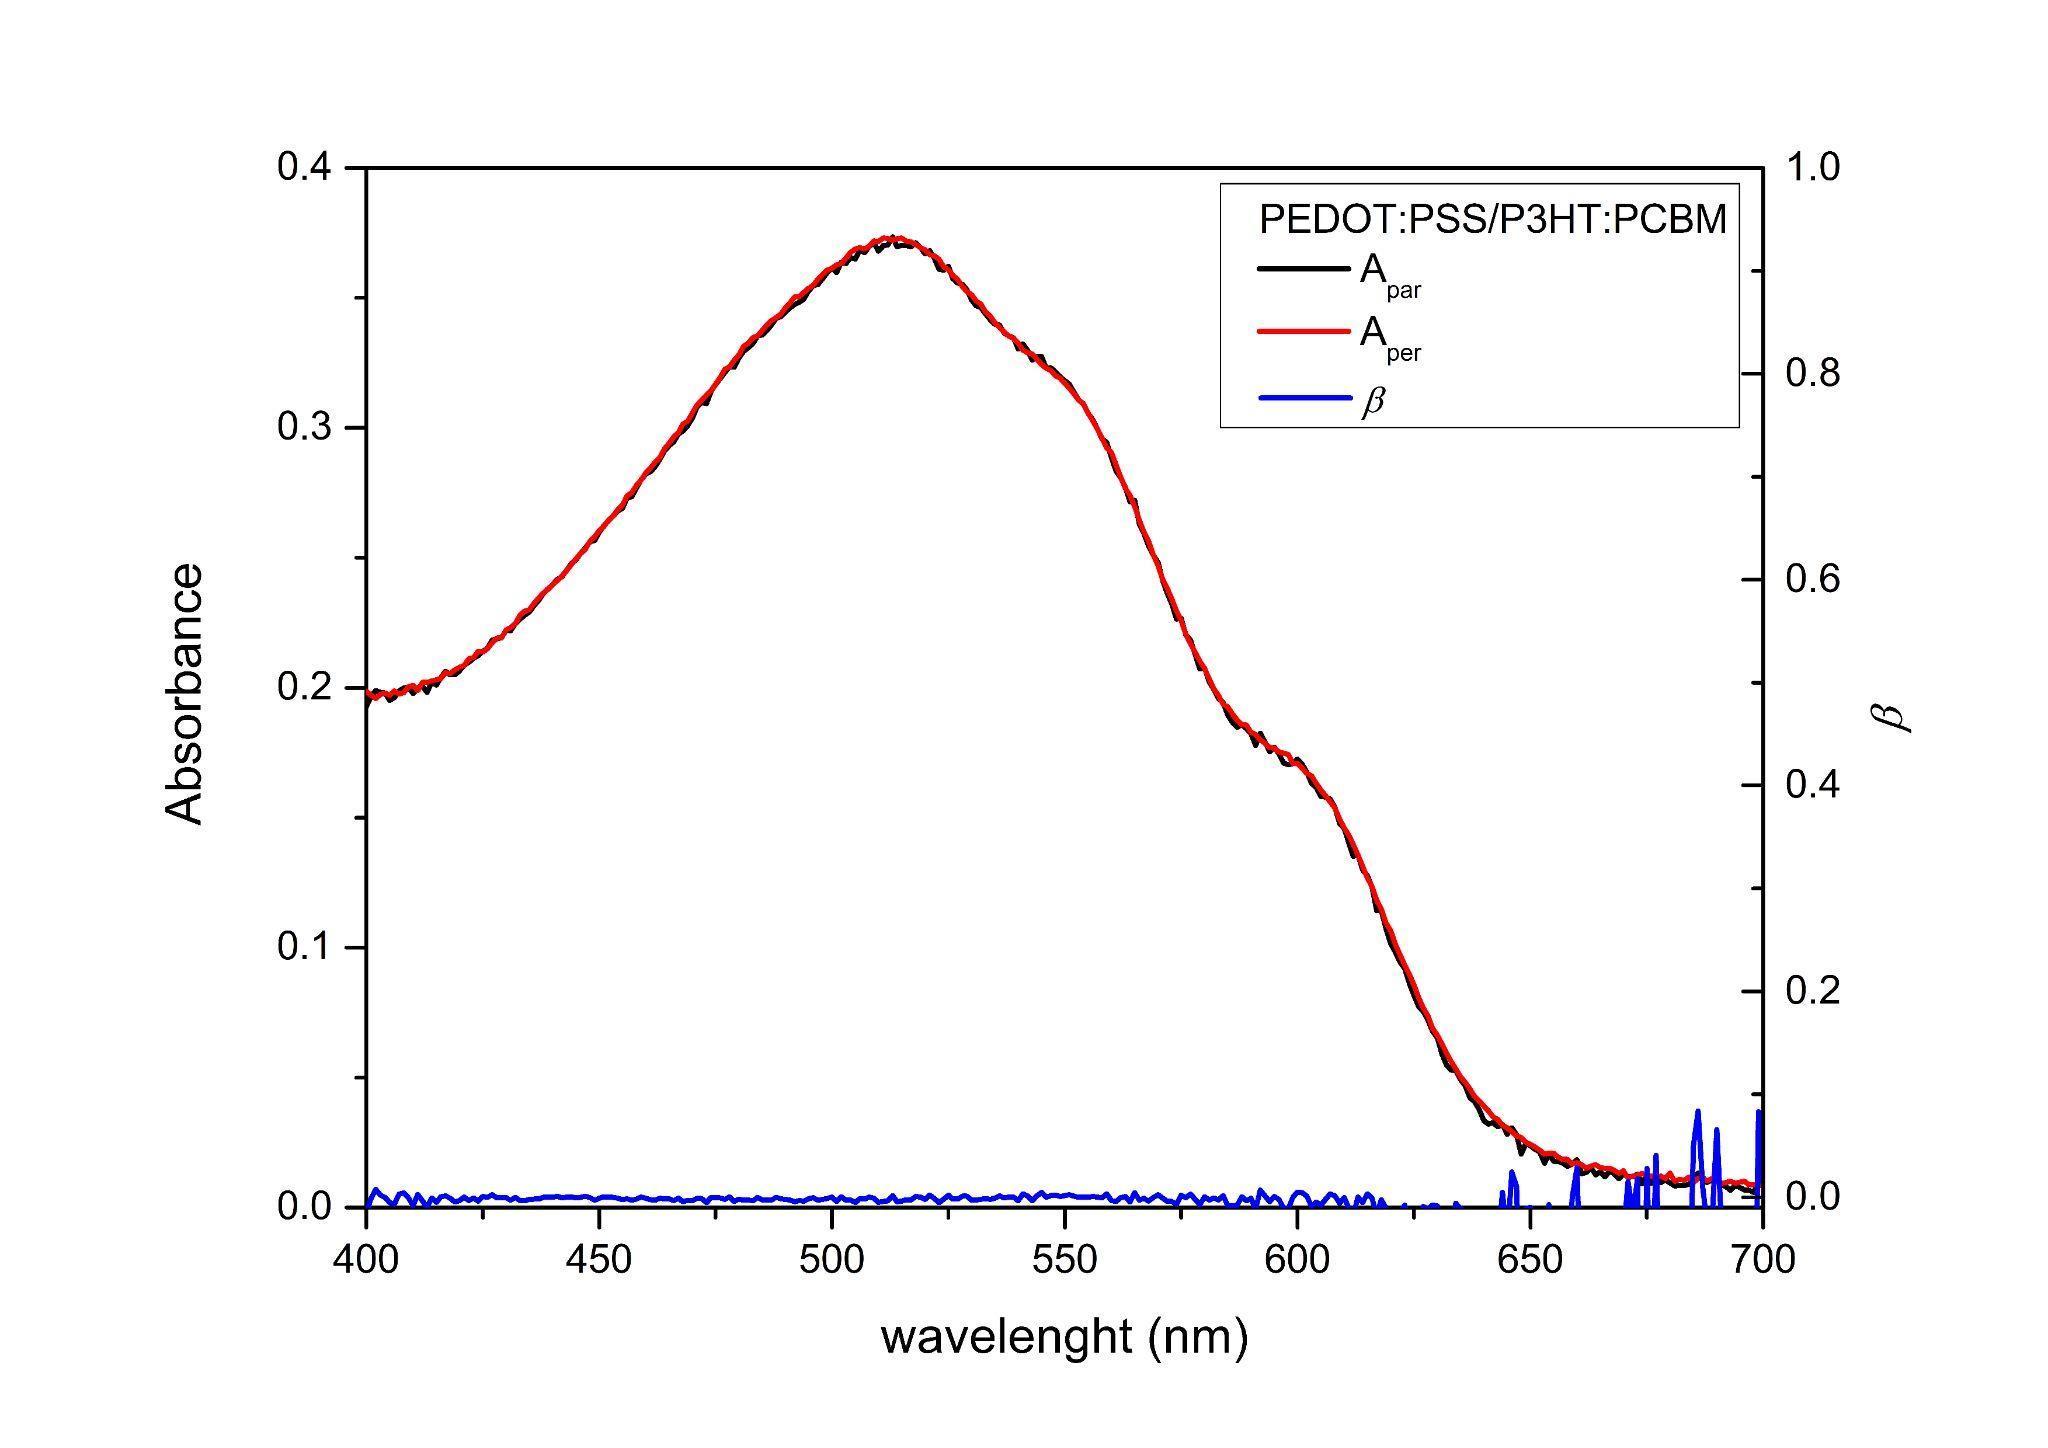


**Figure S4.** **P**arallel (Apar) and perpendicular (Aper) to the laboratory plane UV-Vis absorption spectra of sample PEDOT:PSS/P3HT:PCBM. The blue curve represents the molecular order parameter, *β* ,in the spectral window of the absorption band.


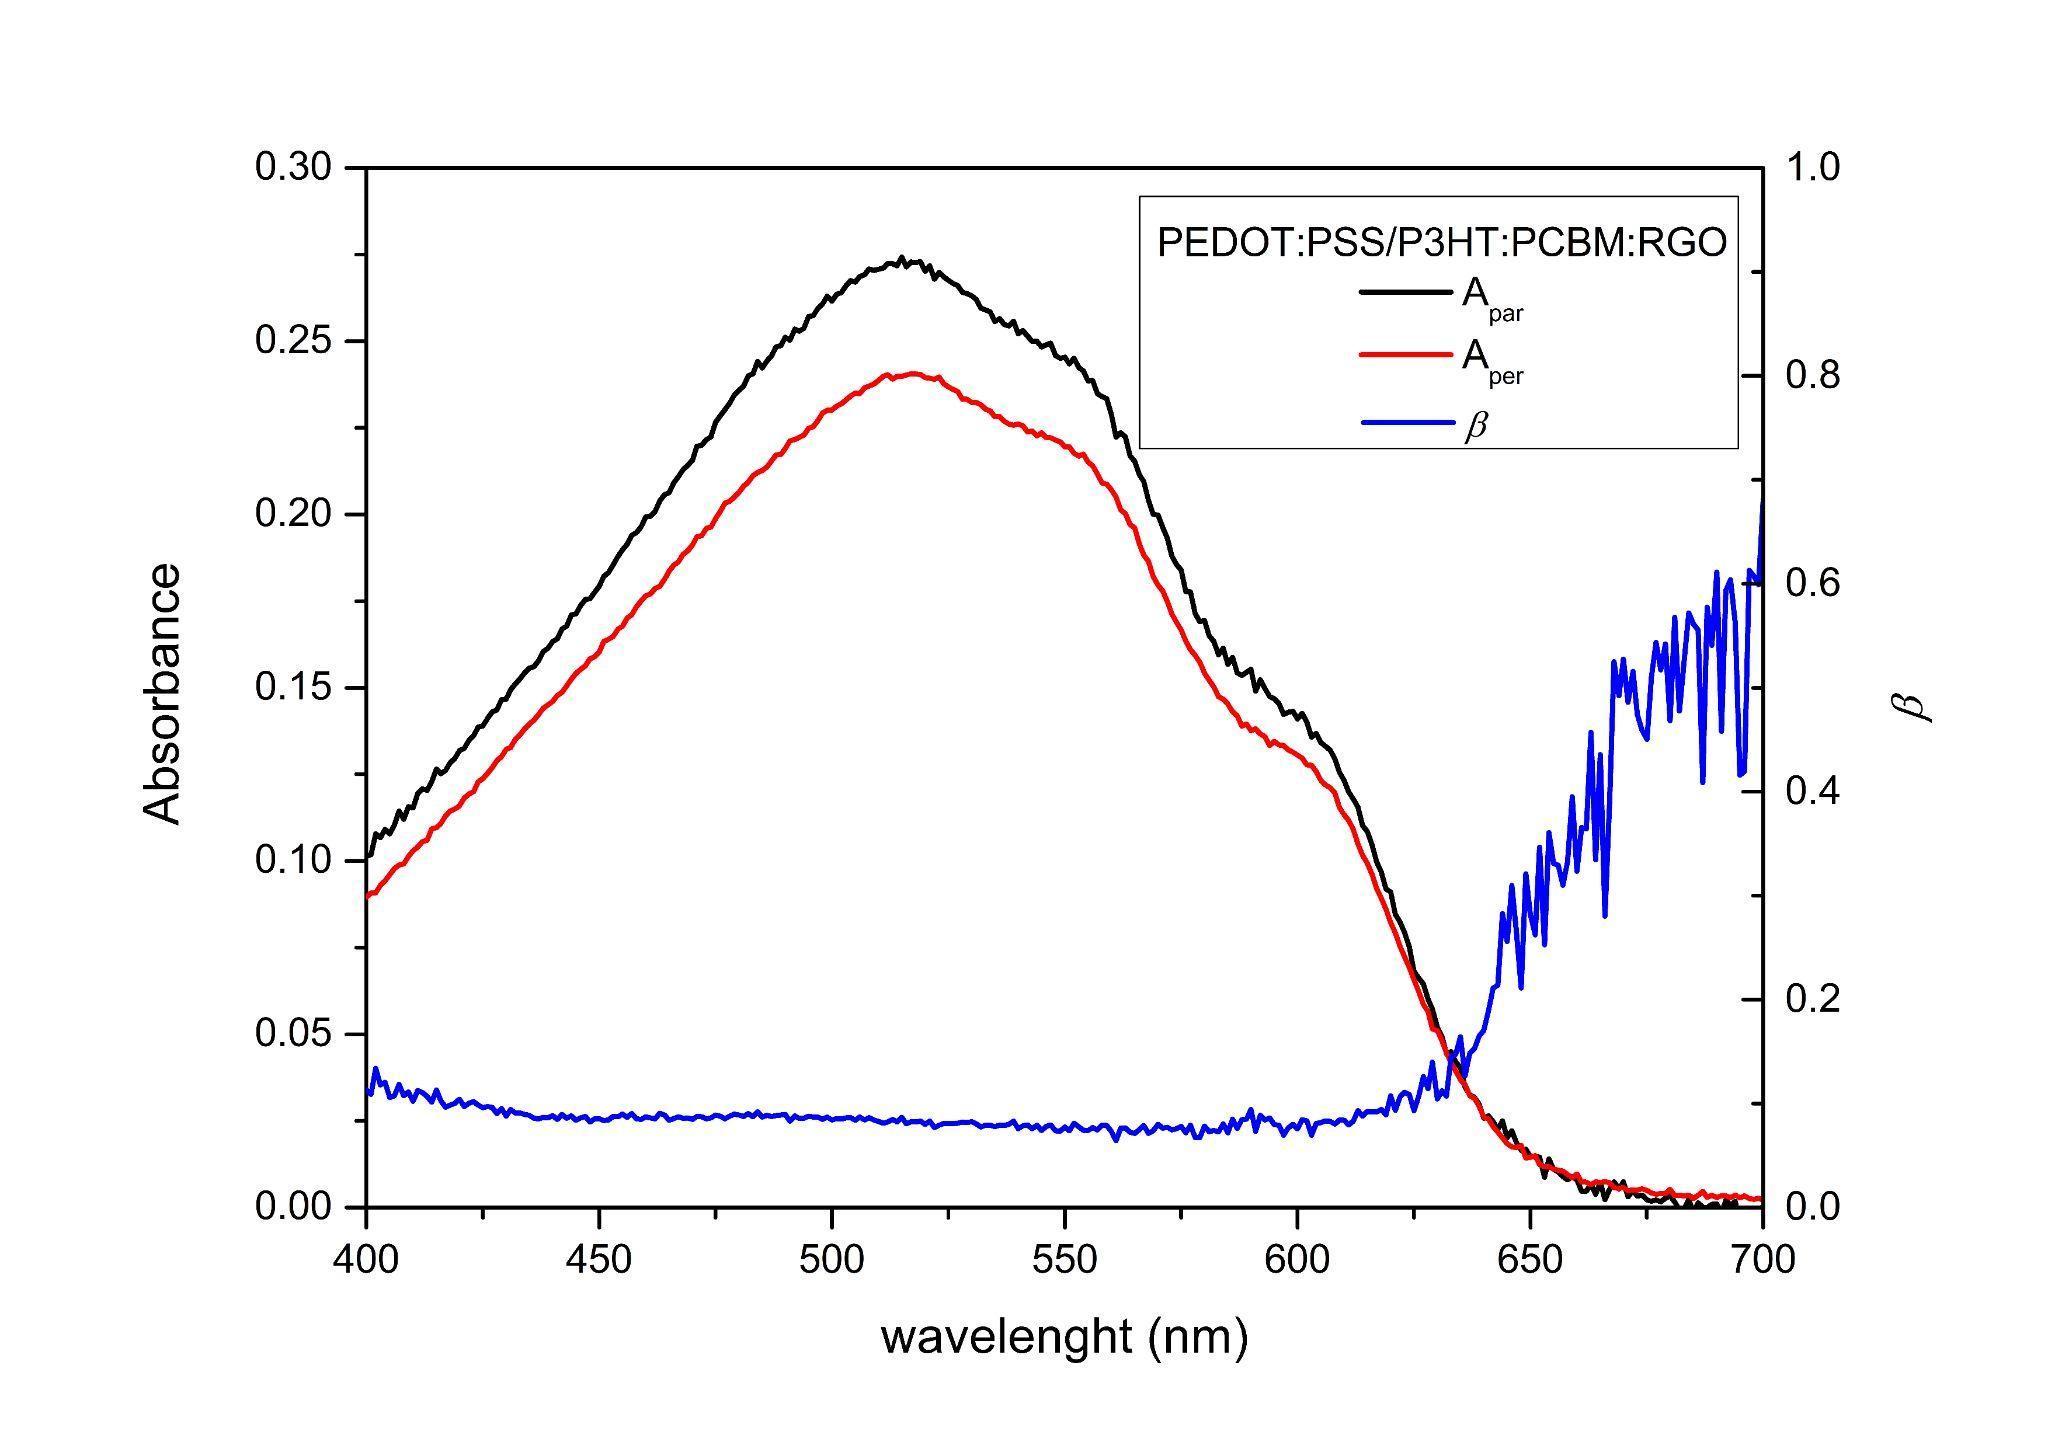


**Figure S5. P**arallel (Apar) and perpendicular (Aper) to the laboratory plane UV-Vis absorption spectra of sample PEDOT:PSS/P3HT:PCBM:RGO. The blue curve represents the molecular order parameter, *β*,in the spectral window of the absorption band.


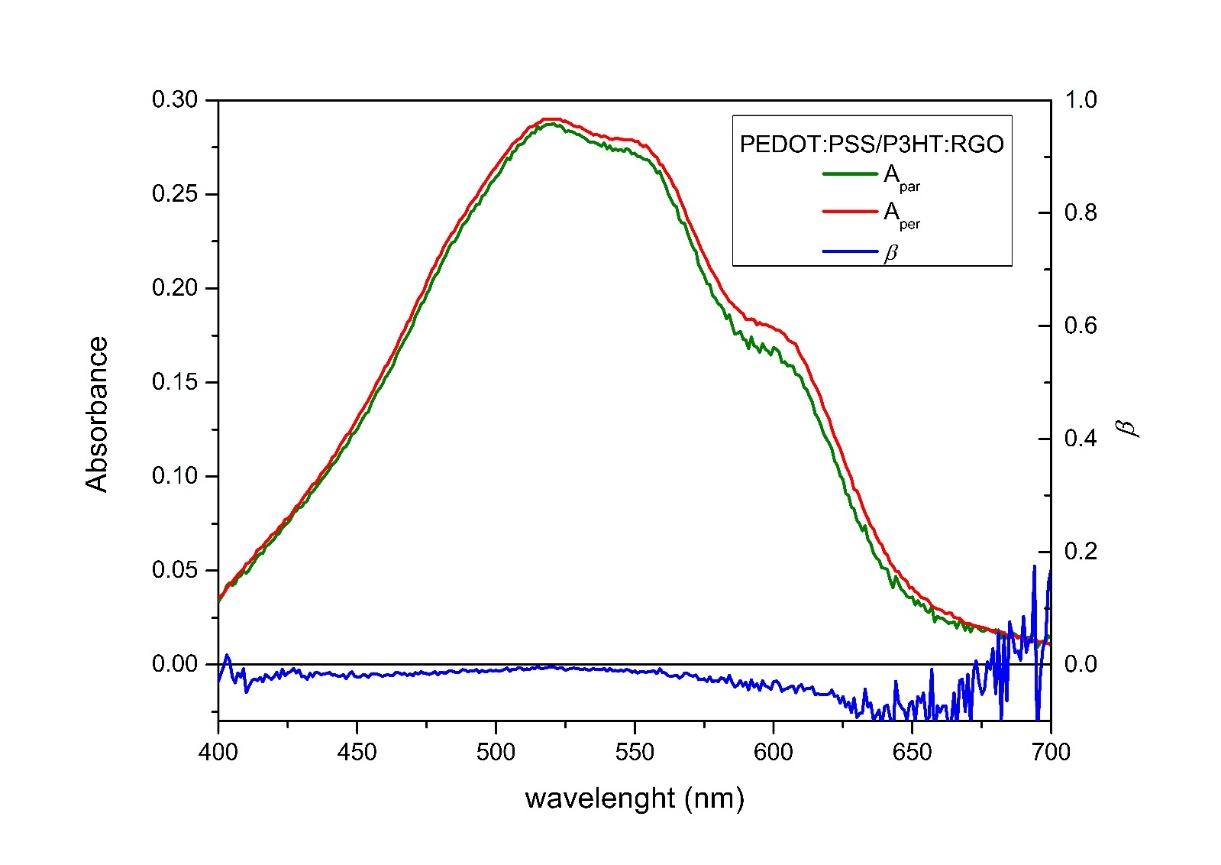


**Figure S6. P**arallel (Apar) and perpendicular (Aper) to the laboratory plane UV-Vis absorption spectra of sample PEDOT:PSS/P3HT:RGO. The blue curve represents the molecular order parameter, *β* ,in the spectral window of the absorption band.
